# Supplementary material for: Impact and utility of follicular lymphoma GELF criteria in routine care: an Australasian Lymphoma Alliance study
Source: PubMed Central journal article supplement — Haematologica. 2024 Mar 7;109(10):3338–45. doi: 10.3324/haematol.2023.284538 (PMC11443368; doi:10.3324/haematol.2023.284538), 2024-03-07
Supplement: 2023_284538_BARRACLOUGH_SUPPL.pdf [file 2023_284538_BARRACLOUGH_SUPPL.pdf]

# Impact and utility of follicular lymphoma GELF criteria in routine care: an Australasian Lymphoma Alliance study

Allison Barraclough,<sup>1,2</sup> Shivam Agrawal,<sup>1,3</sup> Dipti Talaulikar,<sup>4,5</sup> Geoffrey Chong,<sup>1,6</sup> Edward Yoo,<sup>2,7</sup> Chan Y. Cheah,<sup>7,8</sup> Nunzio Franco,<sup>4,5</sup> Bianca Nguyen,<sup>2</sup> Howard Mutsando,<sup>9,10</sup> Fatima Tahir,<sup>11</sup> Judith Trotman,<sup>11</sup> Jing Huang,<sup>12</sup> Colm Keane,<sup>13</sup> Mitchel Lincoln,<sup>14</sup> Tara Cochrane,<sup>15,16</sup> Anna M. Johnston,<sup>17</sup> Michael Dickinson,<sup>18</sup> Stephen Opat,<sup>12,19</sup> Zoe K. McQuilten,<sup>12,19</sup> Erica M. Wood,<sup>12,19</sup> Gayathri St George<sup>19</sup> and Eliza A. Hawkes<sup>1,19</sup>

<sup>1</sup>Olivia Newton John Cancer Research & Wellness Center, Austin Health, Melbourne, Victoria;

<sup>2</sup>Fiona Stanley Hospital, Murdoch, Western Australia; <sup>3</sup>Prince of Wales Hospital, Sydney, New South Wales; <sup>4</sup>Canberra Health Services, Canberra, Australian Capital Territory; <sup>5</sup>College of Health and Medicine, Australian National University, Canberra, Australian Capital Territory;

<sup>6</sup>Ballarat Regional Integrated Cancer Center, Ballarat Health Services, Ballarat, Victoria; <sup>7</sup>Sir Charles Gairdner Hospital, Nedlands, Western Australia; <sup>8</sup>Medical School, University of Western Australia, Perth, Western Australia; <sup>9</sup>Toowoomba Hospital, Toowoomba,

Queensland; <sup>10</sup>University of Queensland Rural Clinical School, Brisbane, Queensland;

<sup>11</sup>Concord Repatriation General Hospital, University of Sydney, Sydney, New South Wales; <sup>12</sup>School of Clinical Sciences at Monash Health, Monash University, Melbourne, Victoria;

<sup>13</sup>Princess Alexandra Hospital, Brisbane, Queensland; <sup>14</sup>Alfred Hospital, Melbourne, Victoria;

<sup>15</sup>Gold Coast University Hospital, Southport, Queensland; <sup>16</sup>School of Medicine, Griffith University, Griffith, Queensland; <sup>17</sup>Royal Hobart Hospital, Hobart, Tasmania; <sup>18</sup>Peter

MacCallum Cancer Center and The Royal Melbourne Hospital, Melbourne, Victoria and

<sup>19</sup>School of Public Health and Preventive Medicine, Monash University, Melbourne, Victoria,

Australia

**Correspondence:** E. Hawkes  
[eliza.hawkes@onjcri.org.au](mailto:eliza.hawkes@onjcri.org.au)

**Received:** October 25, 2023.

**Accepted:** February 28, 2024.

**Early view:** March 7, 2024.

<https://doi.org/10.3324/haematol.2023.284538>

©2024 Ferrata Storti Foundation

Published under a CC BY-NC license

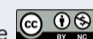

## Supplementary Tables

**Supplementary Table S1. Modified GELF criteria by treatment group**

| Management                     | Number of mGELF criteria |           |           |           |           |          |          |          | Total      |
|--------------------------------|--------------------------|-----------|-----------|-----------|-----------|----------|----------|----------|------------|
|                                | 0                        | 1         | 2         | 3         | 4         | 5        | 6        | 7        |            |
| Watch & Wait                   | 20                       | 15        | 5         | 2         | 0         | 0        | 1        | 0        | 43         |
| Systemic Therapy +/- Radiation | 28                       | 34        | 19        | 21        | 11        | 6        | 1        | 1        | 121        |
| Radiation Alone                | 3                        | 4         | 1         | 1         | 0         | 0        | 0        | 0        | 9          |
| <b>Total</b>                   | <b>51</b>                | <b>53</b> | <b>25</b> | <b>24</b> | <b>11</b> | <b>6</b> | <b>2</b> | <b>1</b> | <b>173</b> |

**Supplementary Table S1. Modified GELF criteria by treatment group**

GELF Groupe d'Etude des Lymphomes Folliculaires

**Supplementary Table S2. Distribution of modified GELFc by management group**

| MANAGEMENT STRATEGY         | SPECIFIC GELF CRITERION |                                           |                      |                        |                       |                    |                             |                     | LDH>ULN<br>(n=43) | B2MG>ULN<br>(n=56) |
|-----------------------------|-------------------------|-------------------------------------------|----------------------|------------------------|-----------------------|--------------------|-----------------------------|---------------------|-------------------|--------------------|
|                             | Mass >7cms<br>(n=47)    | ≥ 3 sites each<br>>3cm diameter<br>(n=30) | B Symptoms<br>(n=29) | Splenomegaly<br>(n=19) | Compression<br>(n=22) | Effusion<br>(n=12) | Leukaemic<br>phase<br>(n=7) | Cytopenias<br>(n=3) |                   |                    |
| Watch & Wait (%)            | 3 (6)                   | 4 (13)                                    | 7 (24)               | 1 (5)                  | 1 (5)                 | 1 (8)              | 1 (14)                      | 1 (33)              | 8 (19)            | 10 (18)            |
| Systemic Therapy +/- RT (%) | 43 (92)                 | 26 (87)                                   | 18 (62)              | 17 (89)                | 20 (90)               | 11 (92)            | 6 (86)                      | 2 (67)              | 34 (79)           | 45 (80)            |
| Radiotherapy Alone (%)      | 1 (2)                   | 0 (0)                                     | 4 (14)               | 1 (5)                  | 1 (5)                 | 0 (0)              | 0 (0)                       | 0 (0)               | 1 (2)             | 1 (2)              |

**Supplementary Table S2. Distribution of modified GELFc by management group**

GELFc=Groupe d'Etude des Lymphomes Folliculaires criteria, n=number, cm=centimetres, RT=Radiotherapy, LDH=lactate dehydrogenase, ULN=upper limit of normal
